# Supplementary figures and images for: Structure-Templated Predictions of Novel Protein Interactions from Sequence Information
Source: PLOS journal article supplement (doi:10.1371/journal.pcbi.0030182), 2007-09-19

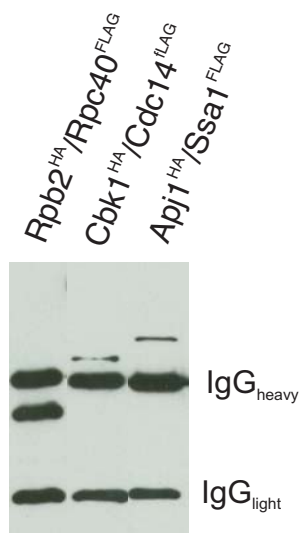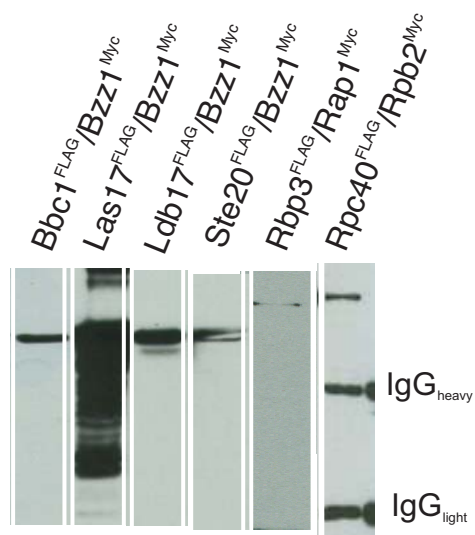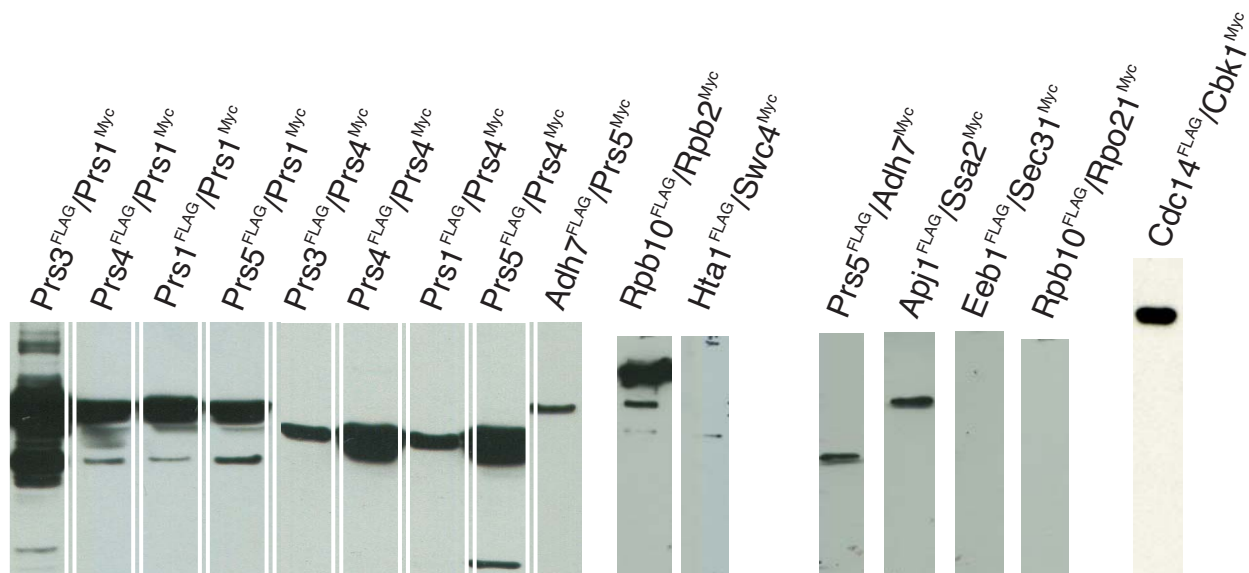

Supplement: S2 (10.1371/journal.pcbi.0030182.s002) [file journal.pcbi.0030182.s002]
